# Supplementary material for: Chromosome length genome assembly of the redbanded stink bug, Piezodorus guildinii (Westwood).
Source: Research Square preprint supplement (doi:10.21203/rs.3.rs-892524/v1), 2021-09-20
Supplement: Supplementary file 1 [file 5600811cfdccfdd59afd39fa.docx]

Supplementary Figure Legends

Figure S1. Female (top left) and male (top right) of *Piezodorus guildinii*. Color of the transverse band on the pronotum and the lateral bands on the edges of wing covers may vary from dark red to light yellow in both sexes. Tips of the abdomen of female and male are shown on the bottom left and bottom right, respectively.

Figure S2. Comparison of the cumulative lengths of the purged input assembly and the final HiRise scaffolds. The scaffold number is given on the X-axis and the cumulative length of each assembly is indicated on the Y-axis. Scaffolds less than 1 kb were excluded.

Figure S3. Cumulative pair size distribution of HiC reads mapped within a chromosome.
